# Supplementary material
Source: MDPI journal article supplement (https://www.mdpi.com/2077-0472/10/3/80)
Supplement: s1 [file s1]

Article

# The effects of preharvest 1-methylcyclopropene (1-MCP) treatment on the fruit quality parameters of cold-stored ‘Szampion’ cultivar apples

Kazimierz Tomala <sup>1</sup>, Marek Grzęda <sup>1</sup>, Dominika Guzek <sup>2\*</sup>, Dominika Głąbska <sup>3</sup> and Krystyna Gutkowska <sup>2</sup>

**Supplementary Table S1.** Results of lightness L\* coordinate of color of blush measured for ‘Szampion’ cultivar apples in preharvest period compared for group treated with 1-MCP and control group not treated with 1-MCP.

| Assessment                 |                  | Preharvest 1-MCP treatment | No preharvest 1-MCP treatment | <i>p</i> |
|----------------------------|------------------|----------------------------|-------------------------------|----------|
| 1 <sup>st</sup> preharvest | Mean±SD          | 40.6±0.7                   | 42.2±3.3                      | 0.3808   |
|                            | Median (min-max) | 40.5 (39.9-41.4)           | 42.4 (38.5-45.3)              |          |
| 2 <sup>nd</sup> preharvest | Mean±SD          | 42.1±1.2                   | 42.5±3.2                      | 0.8322   |
|                            | Median (min-max) | 42.2 (40.8-43.2)           | 42.6 (39.4-45.3)              |          |
| 3 <sup>rd</sup> preharvest | Mean±SD          | 41.5±3.4                   | 42.3±1.2                      | 0.6469   |
|                            | Median (min-max) | 41.9 (37.0-45.0)           | 42.4 (40.9-43.7)              |          |
| 4 <sup>th</sup> preharvest | Mean±SD          | 42.0±1.0                   | 38.4±3.8                      | 0.1224   |
|                            | Median (min-max) | 42.4 (40.5-42.8)           | 39.6 (32.9-41.6)              |          |
| 5 <sup>th</sup> preharvest | Mean±SD          | 42.3±1.3                   | 41.2±1.2                      | 0.2579   |
|                            | Median (min-max) | 42.8 (40.4-43.3)           | 40.8 (40.4-42.9)              |          |
| 6 <sup>th</sup> preharvest | Mean±SD          | 41.0±1.0                   | -                             | -        |
|                            | Median (min-max) | 40.8 (40.1-42.5)           | -                             |          |

\* non-parametric distribution (verified using Shapiro-Wilk test –  $p \leq 0.05$ ); 1-MCP – 1-methylcyclopropene.

**Supplementary Table S2.** Results of a\* coordinate of color measured for ‘Szampion’ cultivar apples in preharvest period compared for group treated with 1-MCP and control group not treated with 1-MCP.

| Assessment                 |                  | Preharvest 1-MCP treatment | No preharvest 1-MCP treatment | <i>p</i> |
|----------------------------|------------------|----------------------------|-------------------------------|----------|
| 1 <sup>st</sup> preharvest | Mean±SD          | 36.1±1.1                   | 34.0±3.4                      | 0.2747   |
|                            | Median (min-max) | 36.1 (34.9-37.3)           | 33.7 (30.9-37.6)              |          |
| 2 <sup>nd</sup> preharvest | Mean±SD          | 34.0±2.2                   | 33.6±4.2                      | 0.8731   |
|                            | Median (min-max) | 34.1 (31.2-36.7)           | 32.7 (29.5-39.5)              |          |
| 3 <sup>rd</sup> preharvest | Mean±SD          | 31.3±3.6                   | 28.3±0.5                      | 0.1528   |
|                            | Median (min-max) | 30.8 (27.5-36.0)           | 28.2 (27.9-29.0)              |          |
| 4 <sup>th</sup> preharvest | Mean±SD          | 29.5±2.0                   | 30.2±2.3                      | 0.6255   |
|                            | Median (min-max) | 29.0 (27.6-32.2)           | 29.6 (28.3-33.4)              |          |
| 5 <sup>th</sup> preharvest | Mean±SD          | 29.0±0.8                   | 32.2±0.6                      | 0.0007   |
|                            | Median (min-max) | 29.0 (28.1-29.9)           | 32.0 (31.6-33.0)              |          |
| 6 <sup>th</sup> preharvest | Mean±SD          | 27.3±1.1                   | -                             | -        |
|                            | Median (min-max) | 27.5 (25.9-28.4)           | -                             |          |

\* non-parametric distribution (verified using Shapiro-Wilk test –  $p \leq 0.05$ ); 1-MCP – 1-methylcyclopropene.

**Supplementary Table S3.** Results of b\* coordinate of color measured for ‘Szampion’ cultivar apples in preharvest period compared for group treated with 1-MCP and control group not treated with 1-MCP.

| Assessment                 |                  | Preharvest 1-MCP treatment | No preharvest 1-MCP treatment | <i>p</i> |
|----------------------------|------------------|----------------------------|-------------------------------|----------|
| 1 <sup>st</sup> preharvest | Mean±SD          | 21.4±0.6                   | 18.6±1.2                      | 0.0058   |
|                            | Median (min-max) | 21.5 (20.7-22.0)           | 18.6 (17.1-20.0)              |          |
| 2 <sup>nd</sup> preharvest | Mean±SD          | 18.9±1.2                   | 18.3±1.9                      | 0.6241   |
|                            | Median (min-max) | 18.9 (17.8-20.1)           | 17.8 (16.7-21.0)              |          |
| 3 <sup>rd</sup> preharvest | Mean±SD          | 13.7±1.9                   | 11.0±0.6                      | 0.3134   |
|                            | Median (min-max) | 13.2 (12.2-16.2)           | 10.8 (10.5-11.7)              |          |
| 4 <sup>th</sup> preharvest | Mean±SD          | 12.2±1.8                   | 12.4±1.0                      | 0.8882   |
|                            | Median (min-max) | 11.5 (11.0-14.8)           | 12.3 (11.4-13.4)              |          |
| 5 <sup>th</sup> preharvest | Mean±SD          | 11.9±1.1                   | 12.4±0.5                      | 0.4326   |
|                            | Median (min-max) | 12.2 (10.2-12.8)           | 12.5 (11.7-12.9)              |          |
| 6 <sup>th</sup> preharvest | Mean±SD          | 10.5±0.4                   | -                             | -        |
|                            | Median (min-max) | 10.7 (10.0-10.9)           | -                             |          |

\* non-parametric distribution (verified using Shapiro-Wilk test –  $p \leq 0.05$ ); 1-MCP – 1-methylcyclopropene.

**Supplementary Table S4.** Results of ethylene production [ $\mu\text{L kg}^{-1}\text{h}^{-1}$ ] measured for 7 days for each preharvest period for 'Szampion' cultivar apples compared for groups treated with 1-MCP and control group not treated with 1-MCP.

| Assessment                 |                     | Preharvest 1-MCP<br>treatment | No preharvest 1-MCP<br>treatment | <i>p</i> |
|----------------------------|---------------------|-------------------------------|----------------------------------|----------|
| 1 <sup>st</sup> preharvest | 1 <sup>st</sup> day | 0.05±0.001                    | 0.04±0.004                       | 0.0256   |
|                            | 2 <sup>nd</sup> day | 0.17±0.162                    | 0.07±0.030                       | 0.4889   |
|                            | 3 <sup>rd</sup> day | 0.27±0.141                    | 0.13±0.002                       | 0.2635   |
|                            | 4 <sup>th</sup> day | 0.69±0.141                    | 5.16±2.898                       | 0.0615   |
|                            | 5 <sup>th</sup> day | 1.30±0.248                    | 10.29±5.933                      | 0.0639   |
|                            | 6 <sup>th</sup> day | 2.56±1.794                    | 24.73±15.058                     | 0.0705   |
|                            | 7 <sup>th</sup> day | 3.93±3.367                    | 61.34±25.809                     | 0.0254   |
| 2 <sup>nd</sup> preharvest | 1 <sup>st</sup> day | 0.10±0.049                    | 1.16±0.180                       | 0.0153   |
|                            | 2 <sup>nd</sup> day | 0.14±0.123                    | 5.71±0.999                       | 0.0160   |
|                            | 3 <sup>rd</sup> day | 0.25±0.104                    | 41.13±39.605                     | 0.2818   |
|                            | 4 <sup>th</sup> day | 0.40±0.100                    | 76.54±78.160                     | 0.3022   |
|                            | 5 <sup>th</sup> day | 0.65±0.077                    | 306.37±32.081                    | 0.0055   |
|                            | 6 <sup>th</sup> day | 0.74±0.259                    | 357.30±1.917                     | 0.0000   |
|                            | 7 <sup>th</sup> day | 2.52±1.594                    | 363.99±102.685                   | 0.0381   |
| 3 <sup>rd</sup> preharvest | 1 <sup>st</sup> day | 1.38±1.195                    | 4.38±0.112                       | 0.0714   |
|                            | 2 <sup>nd</sup> day | 1.73±1.211                    | 56.09±3.748                      | 0.0026   |
|                            | 3 <sup>rd</sup> day | 1.44±0.347                    | 127.39±2.189                     | 0.0002   |
|                            | 4 <sup>th</sup> day | 2.41±1.591                    | 163.15±18.132                    | 0.0064   |
|                            | 5 <sup>th</sup> day | 3.70±2.399                    | 199.21±38.403                    | 0.0188   |
|                            | 6 <sup>th</sup> day | 5.1±4.448                     | 179.95±30.928                    | 0.0157   |
|                            | 7 <sup>th</sup> day | 5.56±4.171                    | 199.37±67.288                    | 0.0500   |
| 4 <sup>th</sup> preharvest | 1 <sup>st</sup> day | 0.07±0.047                    | 1.12±0.673                       | 0.1571   |
|                            | 2 <sup>nd</sup> day | 0.25±0.089                    | 13.09±11.234                     | 0.2473   |
|                            | 3 <sup>rd</sup> day | 2.26±0.882                    | 32.01±21.733                     | 0.1927   |
|                            | 4 <sup>th</sup> day | 18.17±11.925                  | 77.94±33.728                     | 0.1419   |
|                            | 5 <sup>th</sup> day | 34.11±24.733                  | 105.78±14.253                    | 0.0710   |
|                            | 6 <sup>th</sup> day | 37.18±15.867                  | 102.54±5.677                     | 0.0317   |
|                            | 7 <sup>th</sup> day | 47.24±14.082                  | 131.60±3.529                     | 0.0145   |
| 5 <sup>th</sup> preharvest | 1 <sup>st</sup> day | 6.34±8.318                    | 21.13±6.771                      | 0.1139   |
|                            | 2 <sup>nd</sup> day | 16.20±20.878                  | 140.72±19.806                    | 0.0066   |
|                            | 3 <sup>rd</sup> day | 45.01±54.927                  | 263.57±67.185                    | 0.0325   |
|                            | 4 <sup>th</sup> day | 134.79±131.299                | 361.38±122.273                   | 0.1420   |
|                            | 5 <sup>th</sup> day | 224.37±174.213                | 408.34±96.882                    | 0.2133   |
|                            | 6 <sup>th</sup> day | 287.67±182.119                | 398.59±47.155                    | 0.3572   |
|                            | 7 <sup>th</sup> day | 342.78±175.205                | 361.78±33.061                    | 0.8551   |

\* non-parametric distribution (verified using Shapiro-Wilk test –  $p \leq 0.05$ ); 1-MCP – 1-methylcyclopropene.

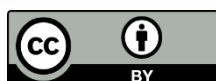

© 2020 by the authors. Submitted for possible open access publication under the terms and conditions of the Creative Commons Attribution (CC BY) license (<http://creativecommons.org/licenses/by/4.0/>).
